# Supplementary material for: Topical Application of Human Wharton’s Jelly Mesenchymal Stem Cells Accelerates Mouse Sciatic Nerve Recovery and is Associated with Upregulated Neurotrophic Factor Expression
Source: PubMed Central journal article supplement — Cell Transplant. 2019 Sep 30;28(12):1560–72. doi: 10.1177/0963689719880543 (PMC6923547; doi:10.1177/0963689719880543), 2019-09-30
Supplement: Supplementary_Tables.pdf [file Supplementary_Tables.pdf]

### **Supplementary Tables**

**Supplementary Table 1.** The percentages (mean  $\pm$  SD) of the pre-transection five-toe spread distance were measured over time between negative control, hWJ-MSC, and hADSC groups.

|        | Negative control (%) | hWJ-MSC (%)    | hADSC (%)      |
|--------|----------------------|----------------|----------------|
| POD 1  | 51.3 $\pm$ 5.1       | 51.4 $\pm$ 5.3 | 48.4 $\pm$ 2.7 |
| POD 7  | 57.6 $\pm$ 4.0       | 68.0 $\pm$ 4.7 | 66.8 $\pm$ 2.7 |
| POD 14 | 59.6 $\pm$ 3.5       | 70.1 $\pm$ 3.8 | 67.7 $\pm$ 3.7 |
| POD 21 | 70.6 $\pm$ 6.6       | 84.9 $\pm$ 8.9 | 71.3 $\pm$ 4.9 |
| POD 28 | 67.0 $\pm$ 1.4       | 86.5 $\pm$ 2.1 | 78.2 $\pm$ 8.7 |
| POD 40 | 66.3 $\pm$ 4.9       | 86.9 $\pm$ 7.5 | 79.6 $\pm$ 8.7 |
| POD 51 | 69.2 $\pm$ 6.9       | 84.7 $\pm$ 7.3 | 82.3 $\pm$ 6.2 |
| POD 56 | 66.6 $\pm$ 1.5       | 84.6 $\pm$ 6.3 | 82.3 $\pm$ 6.1 |
| POD 65 | 62.1 $\pm$ 2.9       | 82.4 $\pm$ 9.2 | 79.5 $\pm$ 6.3 |
| POD 72 | 54.6 $\pm$ 6.9       | 83.5 $\pm$ 8.6 | 80.4 $\pm$ 5.7 |
| POD 88 | 52.7 $\pm$ 5.6       | 87.7 $\pm$ 8.6 | 83.5 $\pm$ 5.6 |
| POD 97 | 53.2 $\pm$ 5.7       | 86.2 $\pm$ 9.5 | 83.6 $\pm$ 3.2 |

**Supplementary Table 2.** The gait angles (mean  $\pm$  SD) were measured over time between negative control, hWJ-MSC, and hADSC groups.

|         | Negative control<br>(Degree) | hWJ-MSC<br>(Degree) | hADSC<br>(Degree) |
|---------|------------------------------|---------------------|-------------------|
| POD 0   | 128.4 $\pm$ 3.4              | 126.5 $\pm$ 5.6     | 129.8 $\pm$ 2.4   |
| POD 7   | 68.9 $\pm$ 3.4               | 68.0 $\pm$ 5.8      | 65.5 $\pm$ 10.6   |
| POD 44  | 59.1 $\pm$ 10.8              | 92.4 $\pm$ 20.6     | 77.5 $\pm$ 10.3   |
| POD 72  | 64.4 $\pm$ 16.6              | 89.7 $\pm$ 19.7     | 77.5 $\pm$ 12.7   |
| POD 109 | 69.6 $\pm$ 10.3              | 93.6 $\pm$ 12.7     | 93.0 $\pm$ 16.7   |
| POD 166 | 68.8 $\pm$ 10.4              | 92.4 $\pm$ 12.5     | 84.7 $\pm$ 10.4   |
| POD 204 | 59.1 $\pm$ 9.8               | 98.6 $\pm$ 14.7     | 94.6 $\pm$ 14.5   |
| POD 236 | 58.5 $\pm$ 9.3               | 106.8 $\pm$ 14.9    | 82.8 $\pm$ 6.4    |
| POD 277 | 48.2 $\pm$ 4.4               | 99.9 $\pm$ 11.7     | 83.4 $\pm$ 16.7   |
| POD 293 | 43.3 $\pm$ 7.2               | 101.9 $\pm$ 15.7    | 88.6 $\pm$ 19.5   |

**Supplementary Table 3.** The percentages (mean  $\pm$  SD) of the pre-transection five-toe spread distance were measured over time between negative control, hWJ-MSC-L, hWJ-MSC-M and hWJ-MSC-H groups.

|         | Negative control (%) | hWJ-MSC-L (%)   | hWJ-MSC-M (%)   | hWJ-MSC-H (%)   |
|---------|----------------------|-----------------|-----------------|-----------------|
| POD 4   | 54.9 $\pm$ 8.0       | 58.2 $\pm$ 2.4  | 57.3 $\pm$ 5.7  | 57.8 $\pm$ 6.1  |
| POD 7   | 58.5 $\pm$ 3.9       | 67.4 $\pm$ 10.3 | 75.1 $\pm$ 4.7  | 75.0 $\pm$ 6.2  |
| POD 21  | 75.6 $\pm$ 6.6       | 81.1 $\pm$ 14.7 | 86.0 $\pm$ 9.7  | 91.9 $\pm$ 4.8  |
| POD 37  | 81.8 $\pm$ 10.5      | 83.2 $\pm$ 13.3 | 86.3 $\pm$ 9.0  | 90.9 $\pm$ 5.5  |
| POD 50  | 71.2 $\pm$ 9.4       | 83.5 $\pm$ 14.0 | 83.4 $\pm$ 10.7 | 93.6 $\pm$ 8.0  |
| POD 76  | 59.0 $\pm$ 10.8      | 83.1 $\pm$ 14.3 | 84.1 $\pm$ 9.9  | 91.8 $\pm$ 6.3  |
| POD 110 | 53.4 $\pm$ 5.9       | 78.4 $\pm$ 18.0 | 79.7 $\pm$ 17.0 | 92.8 $\pm$ 15.1 |

**Supplementary Table 4.** The percentages (mean  $\pm$  SD) of the pre-transection five-toe spread distance were measured over one year between negative control, hWJ-MSC, and hADSC groups.

|         | Negative control (%) | hWJ-MSC (%)     | hADSC (%)       |
|---------|----------------------|-----------------|-----------------|
| POD 1   | 49.6 $\pm$ 5.4       | 48.2 $\pm$ 4.2  | 48.4 $\pm$ 2.7  |
| POD 28  | 67.0 $\pm$ 1.4       | 86.5 $\pm$ 2.1  | 78.2 $\pm$ 8.7  |
| POD 65  | 62.1 $\pm$ 2.9       | 84.4 $\pm$ 5.3  | 79.5 $\pm$ 6.3  |
| POD 97  | 52.8 $\pm$ 4.0       | 89.1 $\pm$ 7.7  | 83.6 $\pm$ 3.2  |
| POD 107 | 53.4 $\pm$ 4.2       | 85.0 $\pm$ 10.4 | 80.4 $\pm$ 6.9  |
| POD 166 | 48.3 $\pm$ 2.6       | 82.4 $\pm$ 11.6 | 70.0 $\pm$ 9.1  |
| POD 204 | 46.3 $\pm$ 5.1       | 79.7 $\pm$ 13.9 | 75.8 $\pm$ 7.3  |
| POD 235 | 47.0 $\pm$ 5.0       | 78.9 $\pm$ 12.2 | 74.2 $\pm$ 7.5  |
| POD 277 | 47.2 $\pm$ 6.6       | 77.6 $\pm$ 12.5 | 71.8 $\pm$ 10.1 |
| POD 293 | 48.0 $\pm$ 7.5       | 77.1 $\pm$ 14.0 | 69.7 $\pm$ 8.3  |
| POD 360 | 46.4 $\pm$ 5.6       | 78.1 $\pm$ 13.1 | 69.3 $\pm$ 8.1  |
